# Supplementary material for: Structure and tailspike glycosidase machinery of ORF212 from E. coli O157:H7 phage CBA120 (TSP3)
Source: PubMed Central journal article supplement (PMC6517402; doi:10.1038/s41598-019-43748-9), 2019-05-14
Supplement: 41598_2019_43748_MOESM1_ESM.pdf [file 41598_2019_43748_MOESM1_ESM.pdf]

**Structure and tailspike glycosidase machinery of ORF212 from *E. coli* O157:H7 phage CBA120 (TSP3)**

Julia Greenfield<sup>1,2</sup>, Xiaoran Shang<sup>1</sup>, Heng Luo<sup>1</sup>, Yan Zhou<sup>1</sup>, Ryan D. Heselpoth<sup>1</sup>, Daniel C. Nelson<sup>1,3,\*</sup>, Osnat Herzberg<sup>1,2,\*</sup>

<sup>1</sup>Institute for Bioscience and Biotechnology Research, University of Maryland, Rockville, Maryland

<sup>2</sup>Department of Chemistry and Biochemistry, University of Maryland, College Park, Maryland

<sup>3</sup>Department of Veterinary Medicine, University of Maryland, College Park, Maryland

\*Corresponding authors: nelsond@umd.edu; osnat@umd.edu

## Supplementary Material

**Table S1: Bacterial strains used in this study**

| <b>Organism</b>                | <b>Strain</b> | <b>Source</b> | <b>Notes</b>                                              |
|--------------------------------|---------------|---------------|-----------------------------------------------------------|
| <i>Escherichia coli</i>        | Rosetta-gami  | Novagen       |                                                           |
| <i>Escherichia coli</i>        | 700728        | ATCC          | O157:H7<br>Non-toxigenic strain                           |
| <i>Escherichia coli</i>        | 43894         | ATCC          | O157:H7 Toxigenic strain                                  |
| <i>Escherichia coli</i>        | 35218         | ATCC          |                                                           |
| <i>Escherichia coli</i>        | TEA023        | Ref. 11       | O157:H7 knockout mutant<br>EDL933 $\Delta$ galU::aad-7    |
| <i>Escherichia coli</i>        | TEA026        | Ref. 11       | O157:H7 knockout mutant<br>EDL933 $\Delta$ galETKM::aad-7 |
| <i>Klebsiella pneumoniae</i>   | 700603        | ATCC          |                                                           |
| <i>Pseudomonas aeruginosa</i>  | 27853         | ATCC          |                                                           |
| <i>Acinetobacter baumannii</i> | BAA-1605      | ATCC          |                                                           |

**Table S2: Plasmids used in this study**

| <b>Plasmid</b>                                    | <b>Relevant properties</b>                                                                                                                                                                                        | <b>Source or Reference</b> |
|---------------------------------------------------|-------------------------------------------------------------------------------------------------------------------------------------------------------------------------------------------------------------------|----------------------------|
| pBAD24                                            | Cloning and expression containing the arabinose pBAD promoter                                                                                                                                                     | Qiagen                     |
| pBAD24:: <i>TSP3</i>                              | WT <i>TSP3</i>                                                                                                                                                                                                    | This work                  |
| pBAD24:: <i>TSP3</i> <sub>E362Q</sub>             | Site-direct mutagenesis of the 362 <sup>nd</sup> amino acid, glutamic acid to glutamine                                                                                                                           | This work                  |
| pBAD24:: <i>TSP3</i> <sub>D383N</sub>             | Site-direct mutagenesis of the 383 <sup>rd</sup> amino acid, aspartic acid to asparagine                                                                                                                          | This work                  |
| pBAD24:: <i>TSP3</i> <sub>D426N</sub>             | Site-direct mutagenesis of the 426 <sup>th</sup> amino acid, aspartic acid to asparagine                                                                                                                          | This work                  |
| pBAD24:: <i>TSP3</i> <sub>E362Q D383N</sub>       | Site-direct mutagenesis of the 362 <sup>nd</sup> amino acid, glutamic acid to glutamine, and 383 <sup>rd</sup> amino, acid aspartic acid to asparagine                                                            | This work                  |
| pBAD24:: <i>TSP3</i> <sub>E362Q D426N</sub>       | Site-direct mutagenesis of the 362 <sup>nd</sup> amino acid, glutamic acid to glutamine, and 426 <sup>th</sup> amino acid, aspartic acid to asparagine                                                            | This work                  |
| pBAD24:: <i>TSP3</i> <sub>D383Q D426N</sub>       | Site-direct mutagenesis of the 383 <sup>rd</sup> amino acid, aspartic acid to asparagine, and 426 <sup>th</sup> amino acid, aspartic acid to asparagine                                                           | This work                  |
| pBAD24:: <i>TSP3</i> <sub>E362Q D383N D426N</sub> | Site-direct mutagenesis of the 362 <sup>nd</sup> amino acid, glutamic acid to glutamine, 383 <sup>rd</sup> amino acid, aspartic acid to asparagine, and 426 <sup>th</sup> amino acid, aspartic acid to asparagine | This work                  |

**Table S3: Primers used in this study.**

| Purpose                                              | Template                                             | Sequence (5' > 3')*                                 |
|------------------------------------------------------|------------------------------------------------------|-----------------------------------------------------|
| Site-directed mutagenesis<br>E326Q                   | pBAD24:: <i>TSP3</i>                                 | [Phos]-ATTCAGTTTATTAGCCAG <b>G</b> AGCCCGAAATTTAC   |
| Site-directed mutagenesis<br>D383N                   | pBAD24:: <i>TSP3</i>                                 | [Phos]-GTTTGGGATACCGCAA <b>A</b> CCTGGCAATTACCAA    |
| Site-directed mutagenesis<br>D426N                   | pBAD24:: <i>TSP3</i>                                 | [Phos]- ACCTGTAGCGTTTTTA <b>A</b> CGCCGTTTCGTGGTCAT |
| Site-directed mutagenesis<br>E326Q<br>D383N          | pBAD24:: <i>TSP3<sub>E362Q</sub></i>                 | [Phos]- GTTTGGGATACCGCAA <b>A</b> CCTGGCAATTACCAA   |
| Site-directed mutagenesis<br>E326Q<br>D426N          | pBAD24:: <i>TSP3<sub>E362Q</sub></i>                 | [Phos]- ACCTGTAGCGTTTTTA <b>A</b> CGCCGTTTCGTGGTCAT |
| Site-directed mutagenesis<br>E326Q<br>D383N<br>D426N | pBAD24:: <i>TSP3<sub>E362Q</sub></i><br><i>D383N</i> | [Phos]- ACCTGTAGCGTTTTTA <b>A</b> CGCCGTTTCGTGGTCAT |

\* Point mutations bold
